# Supplementary material for: Cumulus Cell Transcriptome Signatures as Predictive Biomarkers in ART: A Cross-Sectional Prospective Study of Molecular Determinants for Embryo Competence and Pregnancy Outcomes
Source: Research Square preprint supplement (doi:10.21203/rs.3.rs-7292061/v1), 2025-09-12

**Supplementary Data**


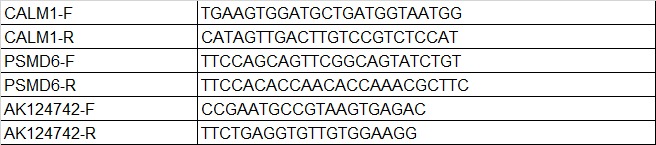
List of primer sequences used for RT-PCR analysis in this study. F: Forward primer. R: reverse primer.

Correlation of fertilization percentage with sperm parameters.

| **Parameter** | correlation coefficient | *P-value* |
| --- | --- | --- |
|
| **count** | +0.039 | *Ns* |
| **morphology** | +0.337 | p < 0.001 |


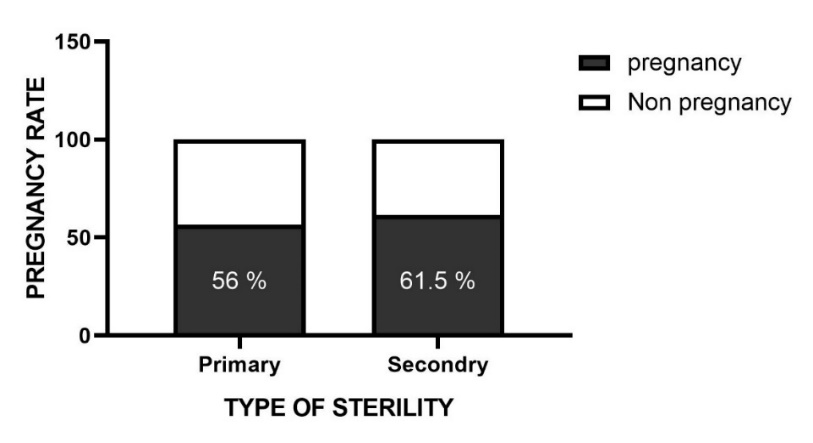
Comparison of chemical fertility percentage in cases with primary infertility compared with cases with secondary infertility (p =0.747).

Comparison of the expression of genes studied in each blood group. The mean expression of *PSMD6* gene in AB blood group was significantly higher than other groups and this difference was significant (p <0.05).


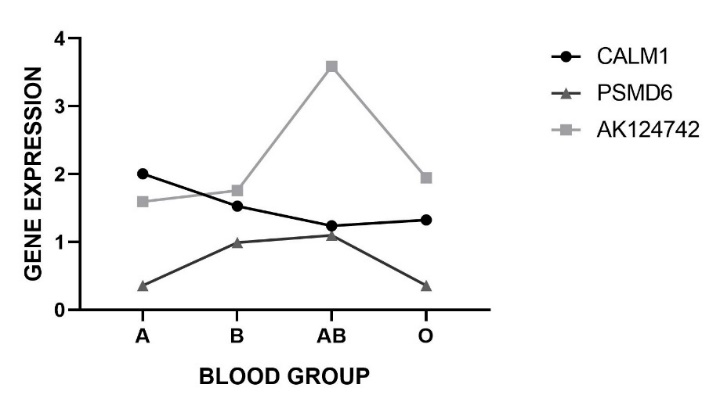

Supplement: Supplementary file 1 [file 645d4b1a06794eae664d231f.docx]
